# Supplementary material
Source: Springer Nature journal article supplement (https://www.springermedizin.de/resource/supplementary/12911_2009_892_MOESM4_ESM.pdf/9527560)

■ Physicians

□ Nurses

50%

40%

30%

20%

10%

0%

Compatibility

Relative advantages

Complexity

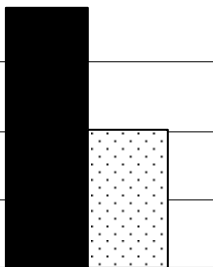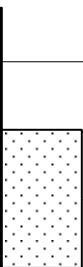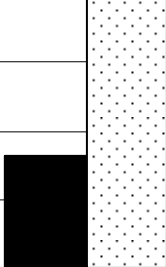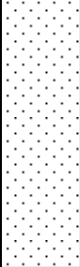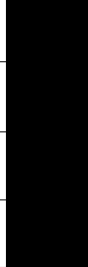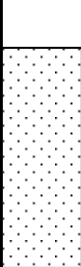

Supplement: MOESM4 [file 9527560]
